# Supplementary material for: Road safety policies in seven West African countries
Source: Royal Society of Chemistry journal article supplement (doi:10.1039/c6cp05618k), 2001-01-01
Supplement: c6cp05618k1.pdf [file c6cp05618k1.pdf]

## Electron Acceptor of Ni Decorated Porous Carbon Nitride Applied In Photocatalytic Hydrogen Production

Lingling Bi,<sup>a</sup> Dedong Meng,<sup>a</sup> Qijing Bu,<sup>a</sup> Yanhong Lin,<sup>a</sup> Dejun Wang,<sup>a,b</sup> and Tengfeng Xie\*<sup>a</sup>

<sup>a</sup> College of Chemistry, Jilin University, Changchun 130012, People's Republic of China.

<sup>b</sup> Department of Chemistry, Tsinghua University, Beijing 100084, People's Republic of China.

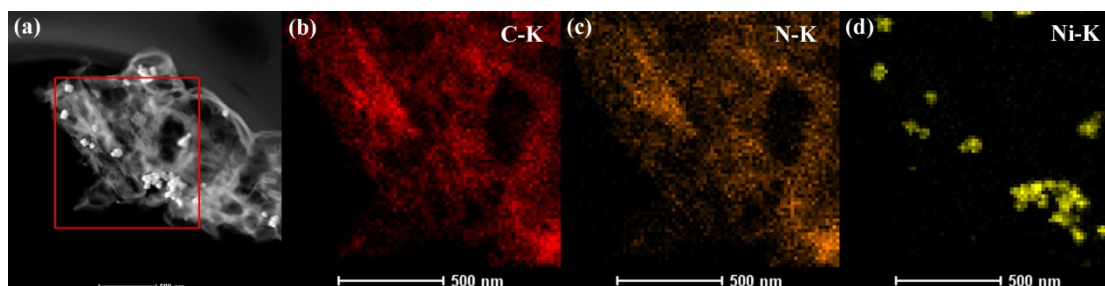

Fig. S1 TEM elemental mapping images of C, N, and Ni of CM-Ni10.

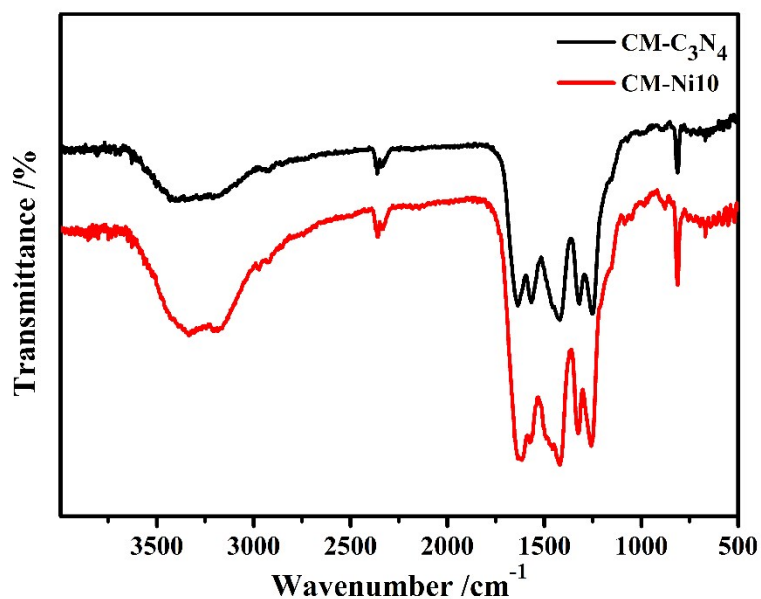

Fig. S2 FTIR spectra of CM-C<sub>3</sub>N<sub>4</sub> and CM-Ni10 samples.

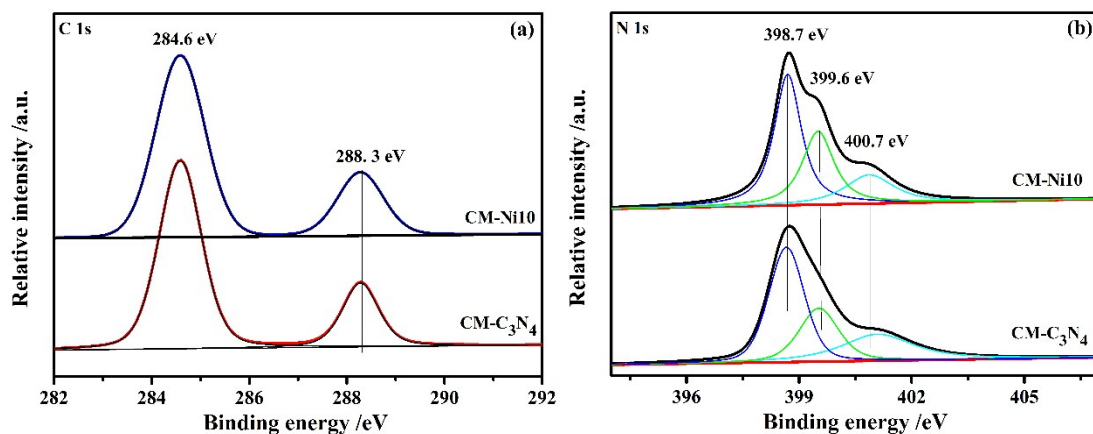

**Fig. S3** The comparison of the curvefitted XPS spectra with the high resolution of C 1s and N 1s binding energy regions about CM-C<sub>3</sub>N<sub>4</sub> and CM-Ni10.

The high resolution of C 1s and N 1s show that it has no obvious change of the CM-Ni10, compared with the CM-C<sub>3</sub>N<sub>4</sub>, suggesting that the metallic nickel is on the surface of the CM-C<sub>3</sub>N<sub>4</sub> but not merge into the lattice.

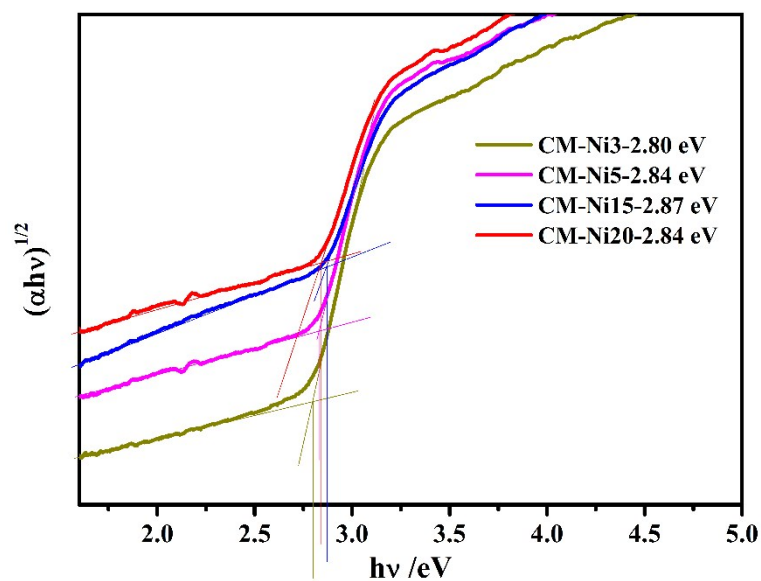

**Fig. S4** Plots of the  $(h\nu)^{1/2}$  vs photo energy ( $h\nu$ ) for Ni/CM-C<sub>3</sub>N<sub>4</sub> composites.

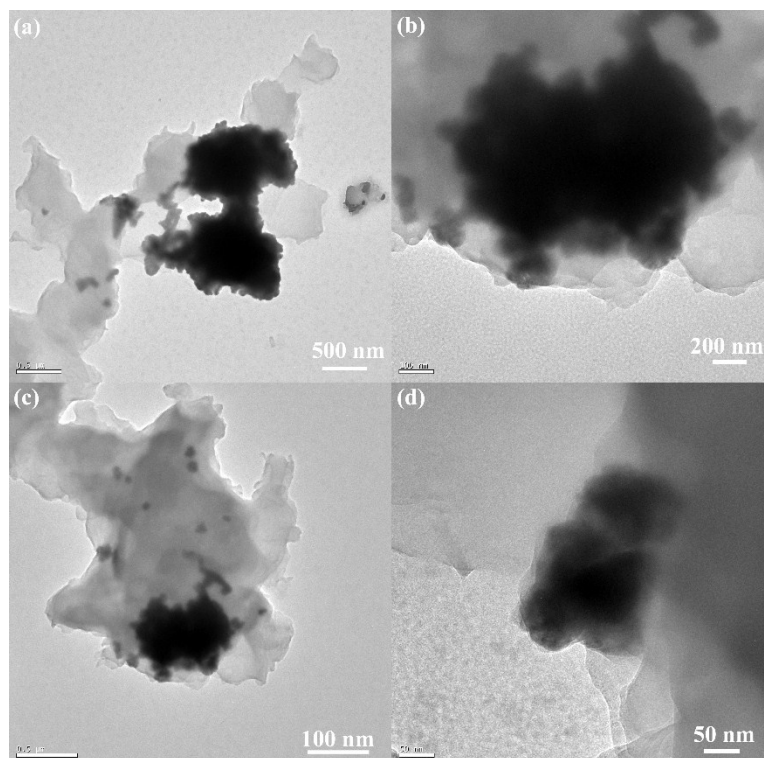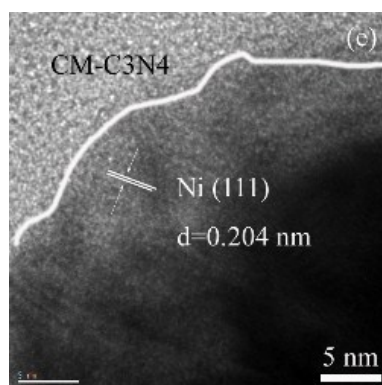

**Fig. S5** TEM images of CM-Ni20 (a-d); the HRTEM image of CM-Ni20 (e).

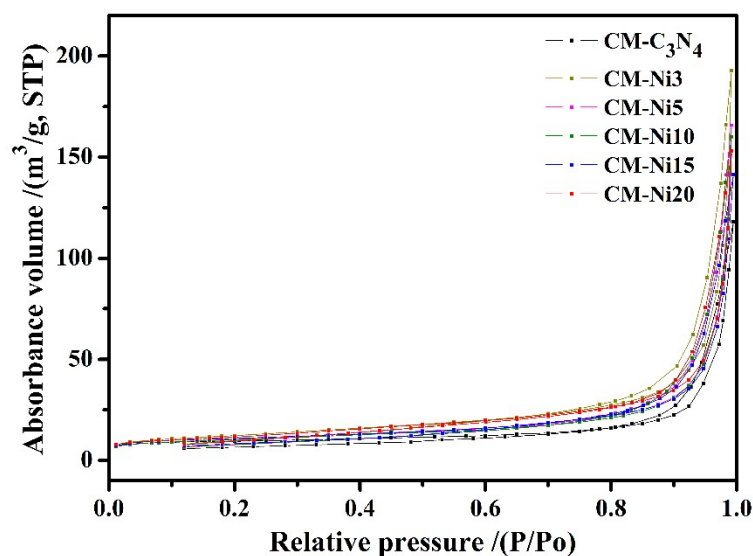

**Fig. S6** Nitrogen gas sorption isotherms of Ni/CM-C<sub>3</sub>N<sub>4</sub> composites.

**Table S1.** The mass ratios of Ni to (Ni+CM-C<sub>3</sub>N<sub>4</sub>)

|            | 1    | 2     | 3     |
|------------|------|-------|-------|
| Feed ratio | 3%   | 10%   | 20%   |
| ICP        | 0.8% | 3.24% | 5.61% |

**Table S2** Carbon nitride-based photocatalysts for hydrogen generation comparison

| Photocatalyst                                             | Light Source        | Sacrificial reagent     | H <sub>2</sub> generation (μmolh <sup>-1</sup> g <sup>-1</sup> ) | Ref (year)            |
|-----------------------------------------------------------|---------------------|-------------------------|------------------------------------------------------------------|-----------------------|
| 10 wt% Ni/CM-C <sub>3</sub> N <sub>4</sub><br>50 mg       | 500 W               | 10 vol% triethanolamine | 313.2                                                            | This work             |
| Zn10/g-C <sub>3</sub> N <sub>4</sub> 0.5 wt% Pt<br>200 mg | 200 W<br>λ > 420 nm | 18.5 vol% methanol      | 297.5                                                            | S <sup>1</sup> (2011) |
| CNIC 3 wt% Pt<br>100 mg                                   | λ > 420 nm          | 10 vol% triethanolamine | 3460                                                             | S <sup>2</sup> (2013) |
| K10/g-C <sub>3</sub> N <sub>4</sub> 0.5 wt% Pt<br>100 mg  | 300 W<br>λ > 420 nm | 10 vol% triethanolamine | 1020.8                                                           | S <sup>3</sup> (2014) |
| C <sub>3</sub> N <sub>4</sub> NTs 2 wt% Pt<br>100 mg      | 300 W<br>λ > 420 nm | 10 vol% methanol        | 135                                                              | S <sup>4</sup> (2015) |
| 2 wt% Ni/g-C <sub>3</sub> N <sub>4</sub><br>50 mg         | 300 W<br>λ > 420 nm | 10 vol% triethanolamine | 100                                                              | S <sup>5</sup> (2015) |
| 10 wt% Ni/g-C <sub>3</sub> N <sub>4</sub><br>50 mg        | 500 W               | 10 vol% triethanolamine | 168.2                                                            | S <sup>6</sup> (2015) |

**Table S3** The BET specific surface area of CM-C<sub>3</sub>N<sub>4</sub> and Ni/CM-C<sub>3</sub>N<sub>4</sub> composites.

| Samples                             | CM-C <sub>3</sub> N <sub>4</sub> | CM-Ni3 | CM-Ni5 | CM-Ni10 | CM-Ni15 | CM-Ni20 |
|-------------------------------------|----------------------------------|--------|--------|---------|---------|---------|
| BET surface area(m <sup>2</sup> /g) | 31.21                            | 43.57  | 36.19  | 35.28   | 37.24   | 41.09   |

### The quantum efficiency

The apparent quantum efficiency (QE) was measured according to the previous literature.<sup>7,8</sup> A 300 W mercury lamp were used as light source to trigger the photocatalytic reaction, and the number of photons of the light source at 365 nm were measured by UV–Visible spectrophotometry. Typically, 100 mL (0.01M) K<sub>3</sub>Fe(C<sub>2</sub>O<sub>4</sub>)<sub>3</sub>·3H<sub>2</sub>O solution (V<sub>0</sub>) were placed in photocatalytic reactor under stirring, and then the solution were irradiated 20s using 365 nm light, 5 mL samples (V<sub>1</sub>) were taken and added into a 50 mL brown volumetric flask; 10 mL of (0.01M) 1,10-Phenanthroline monohydrate solution and 10 mL of acetic acid-sodium acetate buffer solution (pH 4.6) were added, then diluted to 50 mL (V<sub>2</sub>), and placed flask in the dark for 30 min. Three parallel samples of each samples were taken for measuring, and the absorbance was measured at 510 nm (A<sub>t</sub>). The QE was finally calculated by the Eq1.1 and Eq1.2:

$$\Phi_{H_2} = 2nN_0/n' \times 100\% \quad (1.1)$$

Where n is the amount of hydrogen generated in t time (mol/3600 s); N, Avogadro's constant; n', the number of light source emitted photon in per unit time (s<sup>-1</sup>).

$$n' = \frac{(A_t - A_0) N_0 V_0 V_2}{\epsilon L V_1 \Phi_{Fe^{2+}} t}$$

(1.2)

Where A<sub>0</sub> is the absorbance of zero irradiation time; ε, the molar extinction coefficient of Fe<sup>2+</sup> (ε<sub>max</sub>=1.11 × 10<sup>4</sup> L/mol·cm); L, the thickness of the cuvette; t is the irradiation time of the light source, Φ<sub>Fe<sup>2+</sup></sub> is 1.21 (the quantum efficiency of 300 W mercury lamp at λ<sub>max</sub> = 365nm).

According to the calculated results above, the QE of CM-Ni10 is about 0.4% at 365 nm.

### References

- 1 B. Yue, Q. Li, H. Iwai, T. Kako and J. Ye, *Sci Technol Adv Mat.* 2011, **12**, 3.
- 2 H. Gao, S. Yan, J. Wang, Y. A. Huang, P. Wang, Z. Li and Z. Zou, *Phys. Chem. Chem. Phys.*, 2013, **15**, 18077-18084.
- 3 M. Wu, J. M. Yan, X. N. Tang, M. Zhao and Q. Jiang, *ChemSusChem.*, 2014, **7**, 2654-2658.

- 4 K. Li, Z. Zeng, L. Yan, S. Luo, X. Luo, M. Huo and Y. Guo, *Appl. Catal. B-Environ.*, 2015, **165**, 428-437.
- 5 G. Zhang, G. Li and X. Wang, *Chemcatchem.* 2015, **7**, 2864-2870.
- 6 L. L. Bi, D. D. Xu, L. J. Zhang, Y. H. Lin, D. J. Wang and T. F. Xie, *Phys. Chem. Chem. Phys.* 2015, **17**, 29899-29905.
- 7 张耀君, 郭烈锦, 延卫, 赵亮, 杨鸿辉, 李明涛, 许云波. *太阳能学报*, 2006, **27**(11):1113—1116.
- 8 J. Zhang, P. Wang, J. Sun, and Y. D. Jin, *ACS Appl Mater & Inter.*, 2014, **6**, 19905–19913.
